# Supplementary material for: Tunability in the optical response of defective monolayer WSe2 by computational analysis
Source: Royal Society of Chemistry journal article supplement (doi:10.1039/c8nr02906g), 2018-01-01
Supplement: c8nr02906g1.pdf [file c8nr02906g1.pdf]

## Supplementary Information

# Tunability in the optical response of defective monolayer WSe<sub>2</sub> by computational analysis

*Jie Jiang, Ruth Pachter,\* Shin Mou*

Air Force Research Laboratory, Wright-Patterson Air Force Base, OH 45433, USA

---

\* Corresponding author: [ruth.pachter@us.af.mil](mailto:ruth.pachter@us.af.mil)

## Formation Energies

Defect formation energies  $E_f$  were calculated at the DFT/PBE level using the expression  $E_f = [E_{defect} + n_i \mu_i] - E_{pristine}$ , where  $E_{defect}$  is the total energy of the WSe<sub>2</sub> supercell with defects;  $E_{pristine}$  is the total energy of the pristine WSe<sub>2</sub> supercell;  $n_i$  is the number of  $i$  elements (W or Se) removed from pristine WSe<sub>2</sub> to create the defects; and  $\mu_i$  is the chemical potential of element  $i$ . For the SV, DV, WV, T<sub>1</sub>, T<sub>2</sub>, T<sub>3</sub> defects in 2D WSe<sub>2</sub>,  $n_i \mu_i = \mu_{Se}, 2\mu_{Se}, \mu_W, 6\mu_{Se}, 10\mu_{Se}, 14\mu_{Se}$ , respectively. The chemical potential was calculated by  $\mu_W + 2\mu_{Se} = \mu_{WSe_2}$ ,<sup>1</sup> where  $\mu_W$ ,  $\mu_{Se}$ , and  $\mu_{WSe_2}$  are the chemical potentials for W, Se, and WSe<sub>2</sub>, respectively.  $\mu_{WSe_2}$  was calculated as the total energy per primitive cell of pristine WSe<sub>2</sub>,  $\mu_W^{Max}$  is the total energy per atom of a bcc W metal, and  $\mu_{Se}^{Max}$  the total energy per atom of a grey Se crystal.

At the DFT/PBE level we obtained  $\mu_{WSe_2} = -21.67$  eV,  $\mu_W^{Max} = -13.02$  eV,  $\mu_{Se}^{Max} = -3.50$  eV;  $\mu_W^{Min} = \mu_{WSe_2} - 2\mu_{Se}^{Max} = -14.68$  eV, and  $\mu_{Se}^{Min} = (\mu_{WSe_2} - \mu_W^{Max})/2 = -4.33$  eV. For a W rich environment,  $\mu_W = \mu_W^{Max}$  and  $\mu_{Se} = \mu_{Se}^{Min}$ , and the defect formation energies of 1.85 eV, 3.23 eV, 5.17 eV, 6.91 eV, 11.20 eV, and 15.38 eV, for SV, DV, WV, T<sub>1</sub>, T<sub>2</sub>, and T<sub>3</sub>, respectively, were calculated, while for an Se rich environment, where  $\mu_{Se} = \mu_{Se}^{Max}$  and  $\mu_W = \mu_W^{Min}$ , defect formation energies were 2.68 eV, 4.89 eV, 3.51 eV, 11.88 eV, 19.49 eV, and 26.98 eV, for SV, DV, WV, T<sub>1</sub>, T<sub>2</sub>, and T<sub>3</sub> defects, respectively. The results for SV, DV, and WV agree with previous DFT calculations.<sup>1</sup>

## Reference

1. S. Haldar, H. Vovusha, M. K. Yadav, O. Eriksson, B. Sanyal, *Phys. Rev. B* 2015, **92**, 235408.

**Table S1.** RPA excitation energies for monolayer WSe<sub>2</sub> with T<sub>1</sub>, T<sub>2</sub>, and T<sub>3</sub> defects: D<sub>1</sub>, D<sub>2</sub>, D<sub>3</sub>, and D<sub>4</sub> bound excitons (in eV).

|                | D <sub>1</sub> | D <sub>2</sub> | D <sub>3</sub> | D <sub>4</sub> |
|----------------|----------------|----------------|----------------|----------------|
| T <sub>1</sub> | 1.28           | 1.00           | 0.64           |                |
| T <sub>2</sub> | 1.44           | 0.77           | 0.11           |                |
| T <sub>3</sub> | 1.26           | 1.12           | 0.83           | 0.10           |

(a)

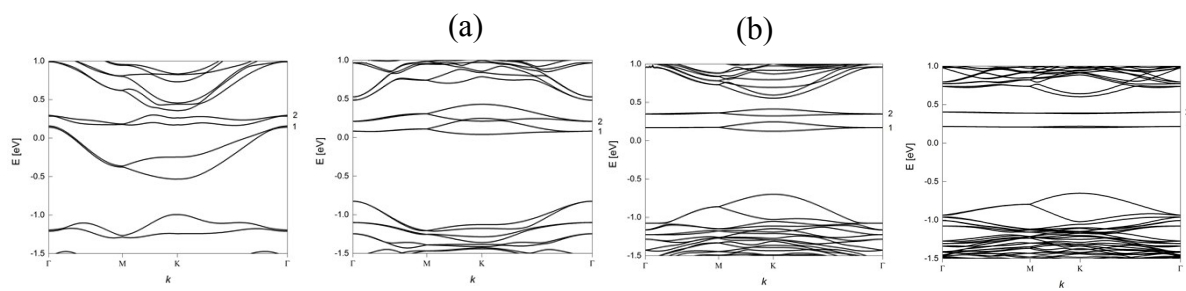

**Figure S1.** PBE+SOC band structures for monolayer WSe<sub>2</sub> with a SV defect using (a)  $2 \times 2 \times 1$ , (b)  $3 \times 3 \times 1$ , (c)  $4 \times 4 \times 1$ , and (d)  $5 \times 5 \times 1$  supercells. Defect bands are numerically labelled.

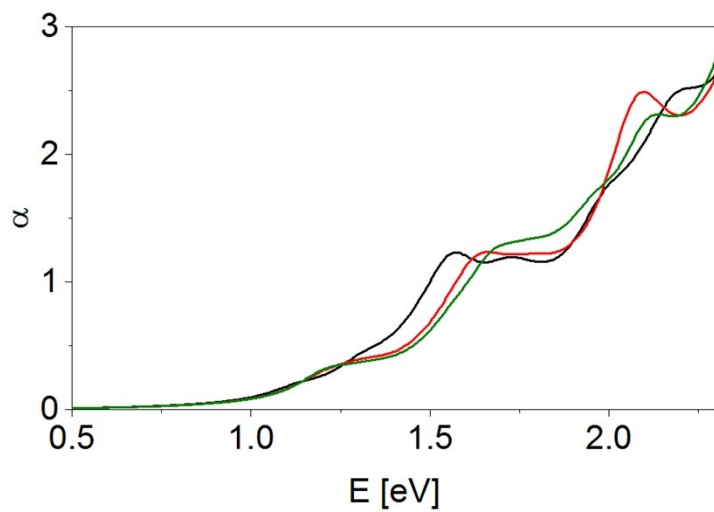

**Figure S2.** Convergence of the absorption spectrum of monolayer WSe<sub>2</sub> with a SV defect with respect to  $k$ -point sampling. Black, red, and green are for  $3 \times 3 \times 1$ ,  $4 \times 4 \times 1$ , and  $5 \times 5 \times 1$   $k$  samplings, respectively.

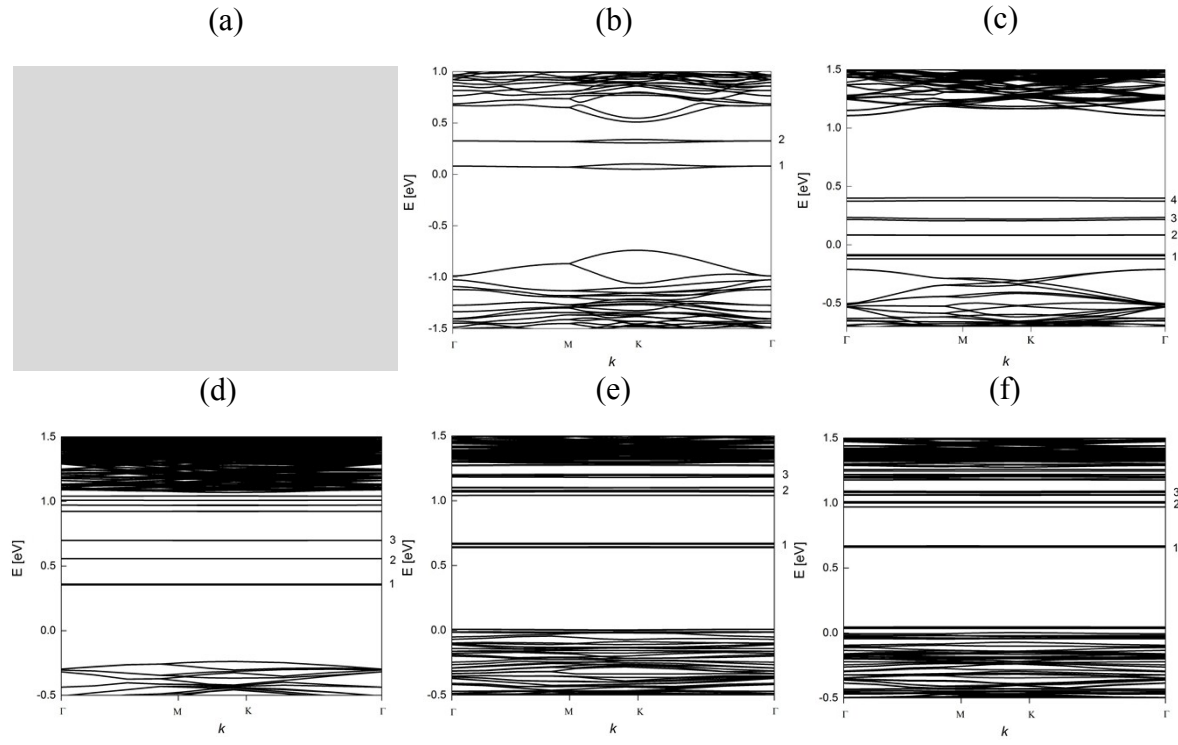

**Figure S3.** PBE+SOC band structures for monolayer WSe<sub>2</sub> with (a) SV, (b) DV, (c) WV, (d) T<sub>1</sub>, (e) T<sub>2</sub>, and (f) T<sub>3</sub> defects. Bound defect bands are numerically labelled.

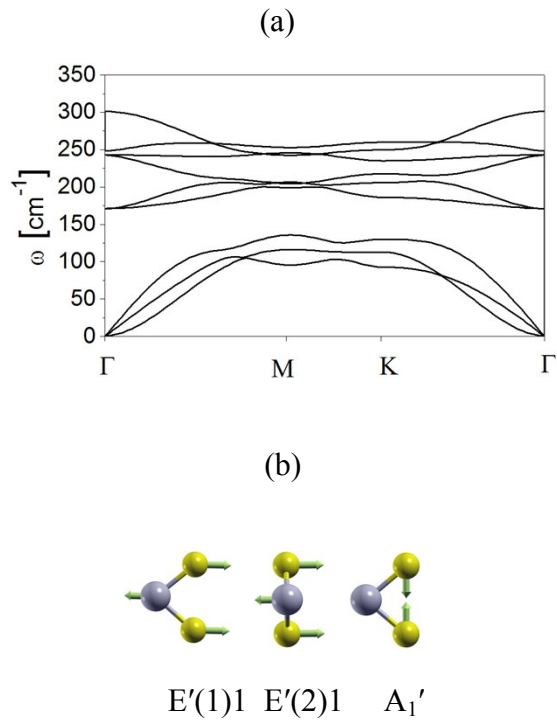

**Figure S4.** Phonons in pristine 2D WSe<sub>2</sub>: (a) phonon dispersion, and (b) phonon eigenvectors for 1<sup>st</sup> order Raman active modes E' and A<sub>1</sub>'.
